# Supplementary material for: Phylogenetic Distribution of Phenotypic Traits in Bacillus thuringiensis Determined by Multilocus Sequence Analysis
Source: PubMed Central journal article supplement (PMC3677866; doi:10.1371/journal.pone.0066061), 2013-06-10
Supplement: pone.0066061.s002.pdf [file pone.0066061.s002.pdf]

# Supplemental Figure 2

## Maximum Likelihood Analysis of Clade 1 Sequence Types

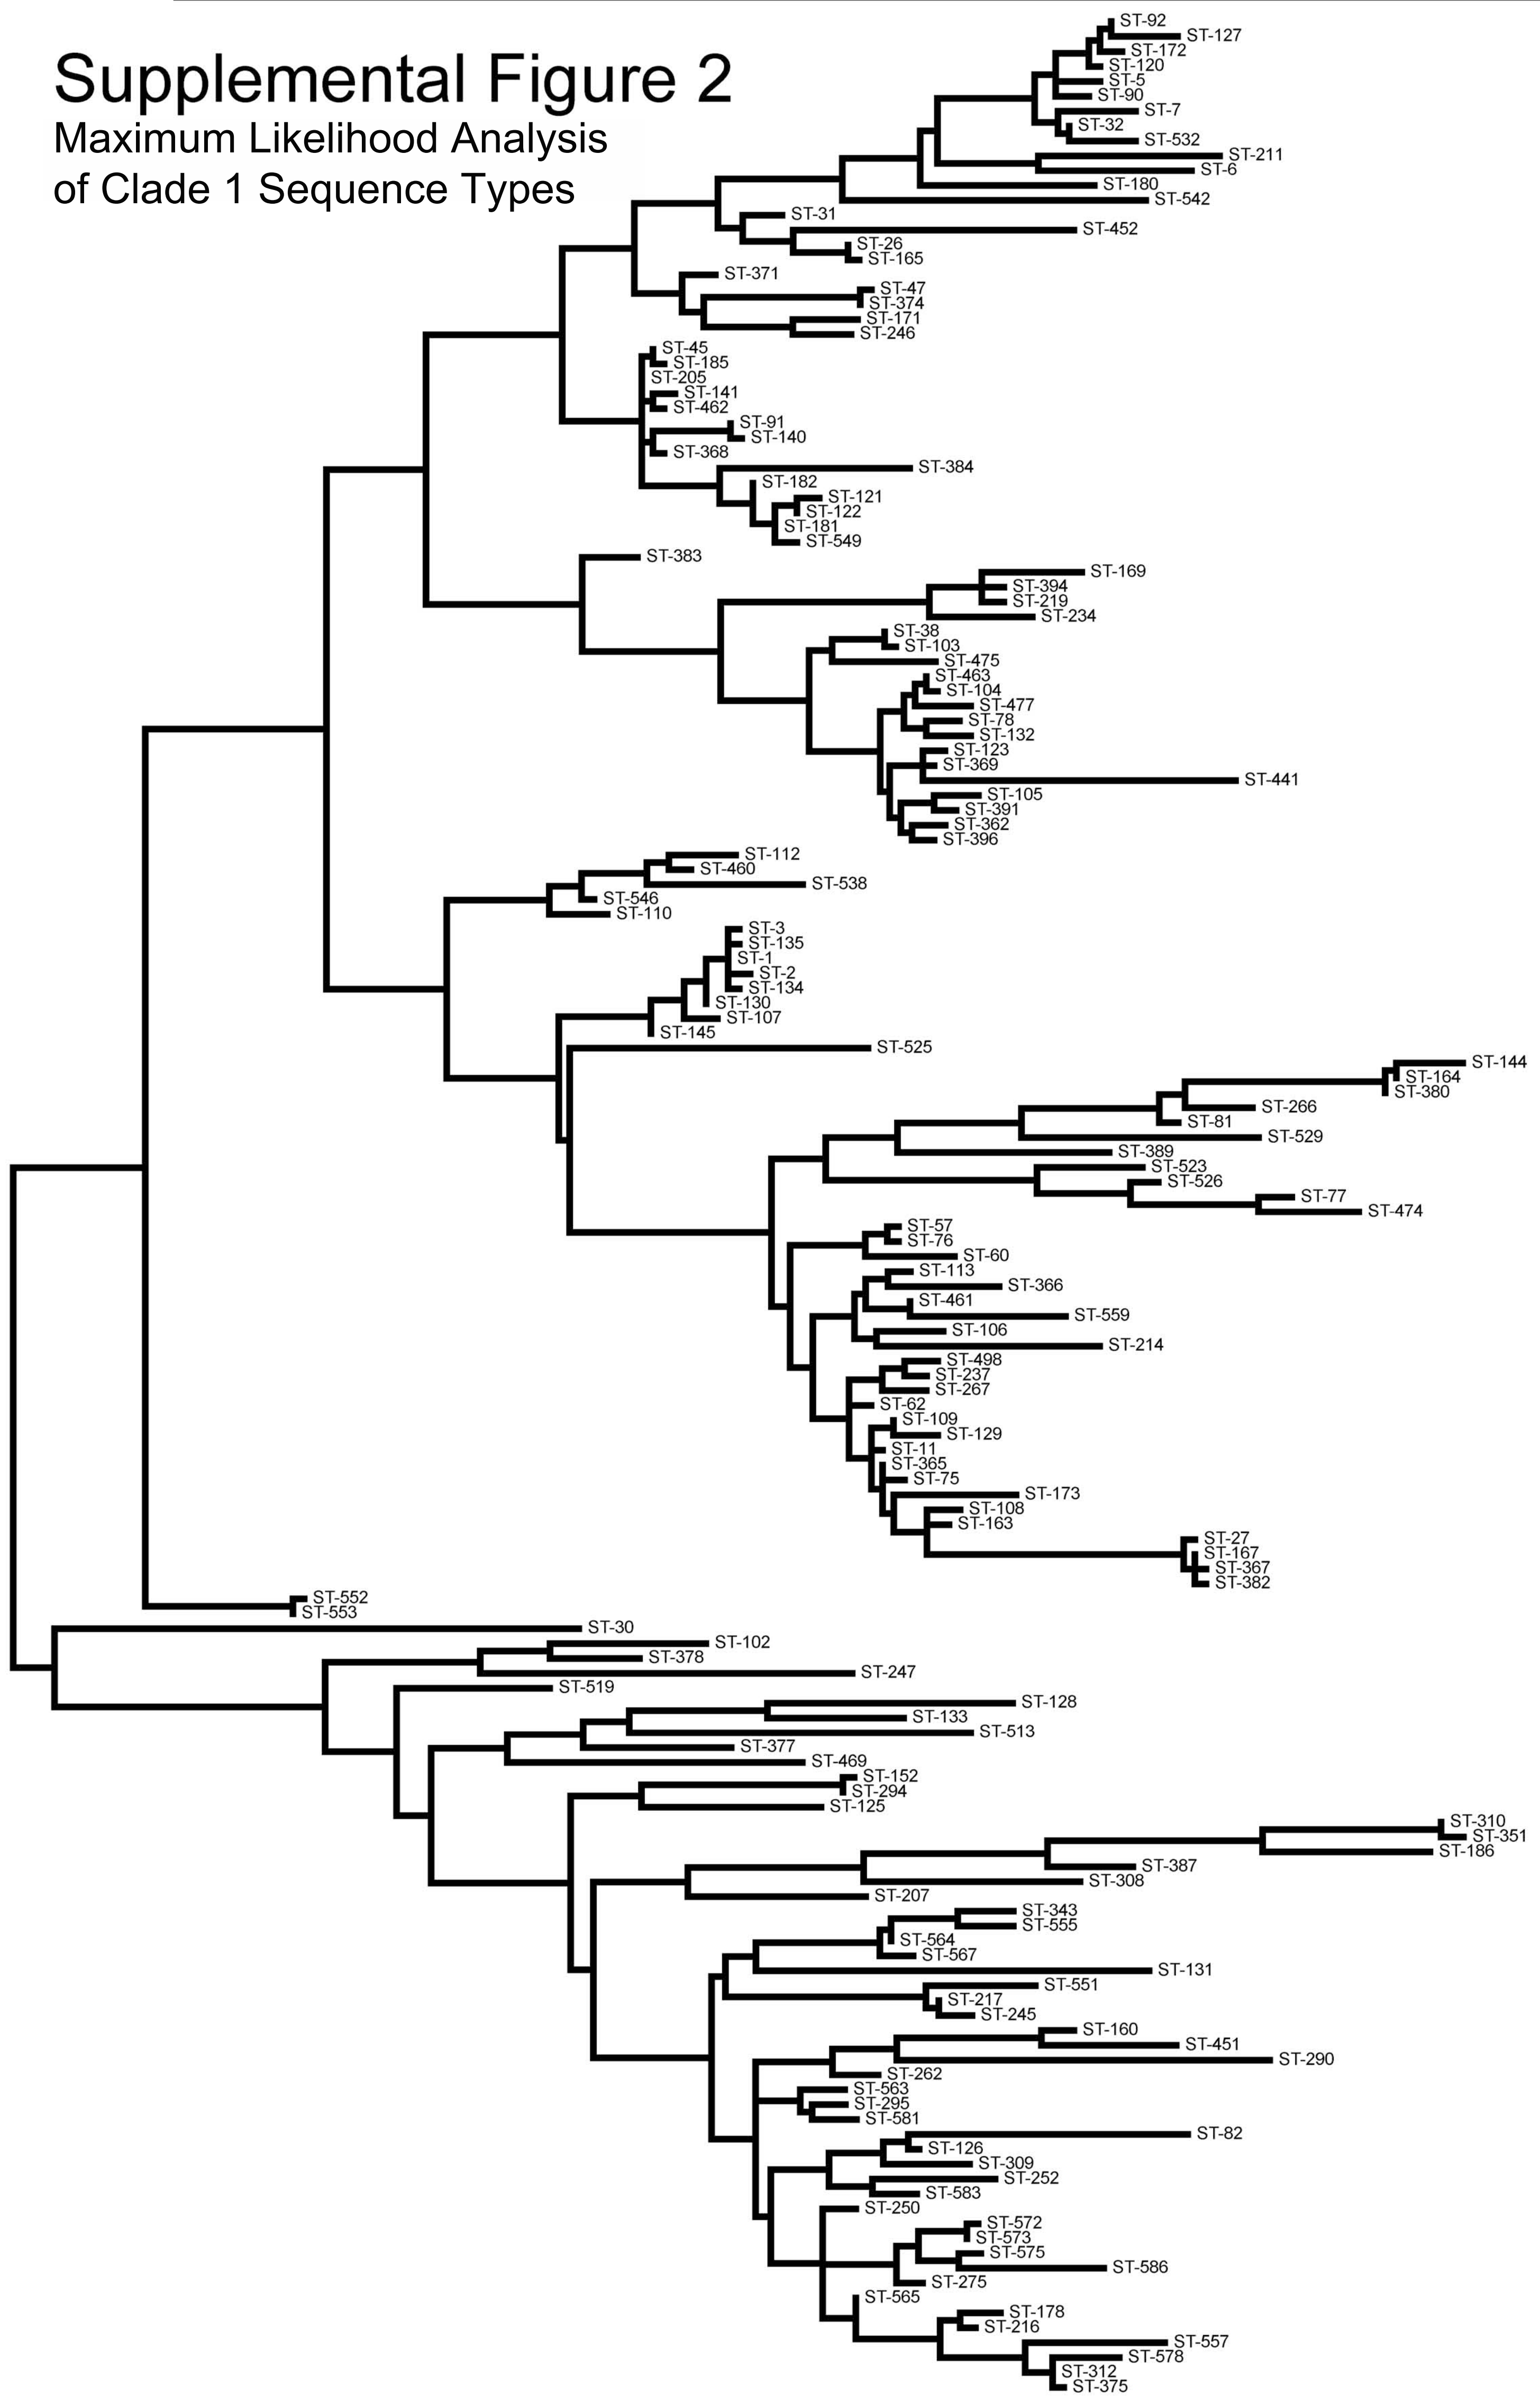

0.005
