# Supplementary material for: Phylogenetic Distribution of Phenotypic Traits in Bacillus thuringiensis Determined by Multilocus Sequence Analysis
Source: PubMed Central journal article supplement (PMC3677866; doi:10.1371/journal.pone.0066061), 2013-06-10

# Supplemental Figure 3

## Maximum Likelihood Analysis of Clade 2 Sequence Types

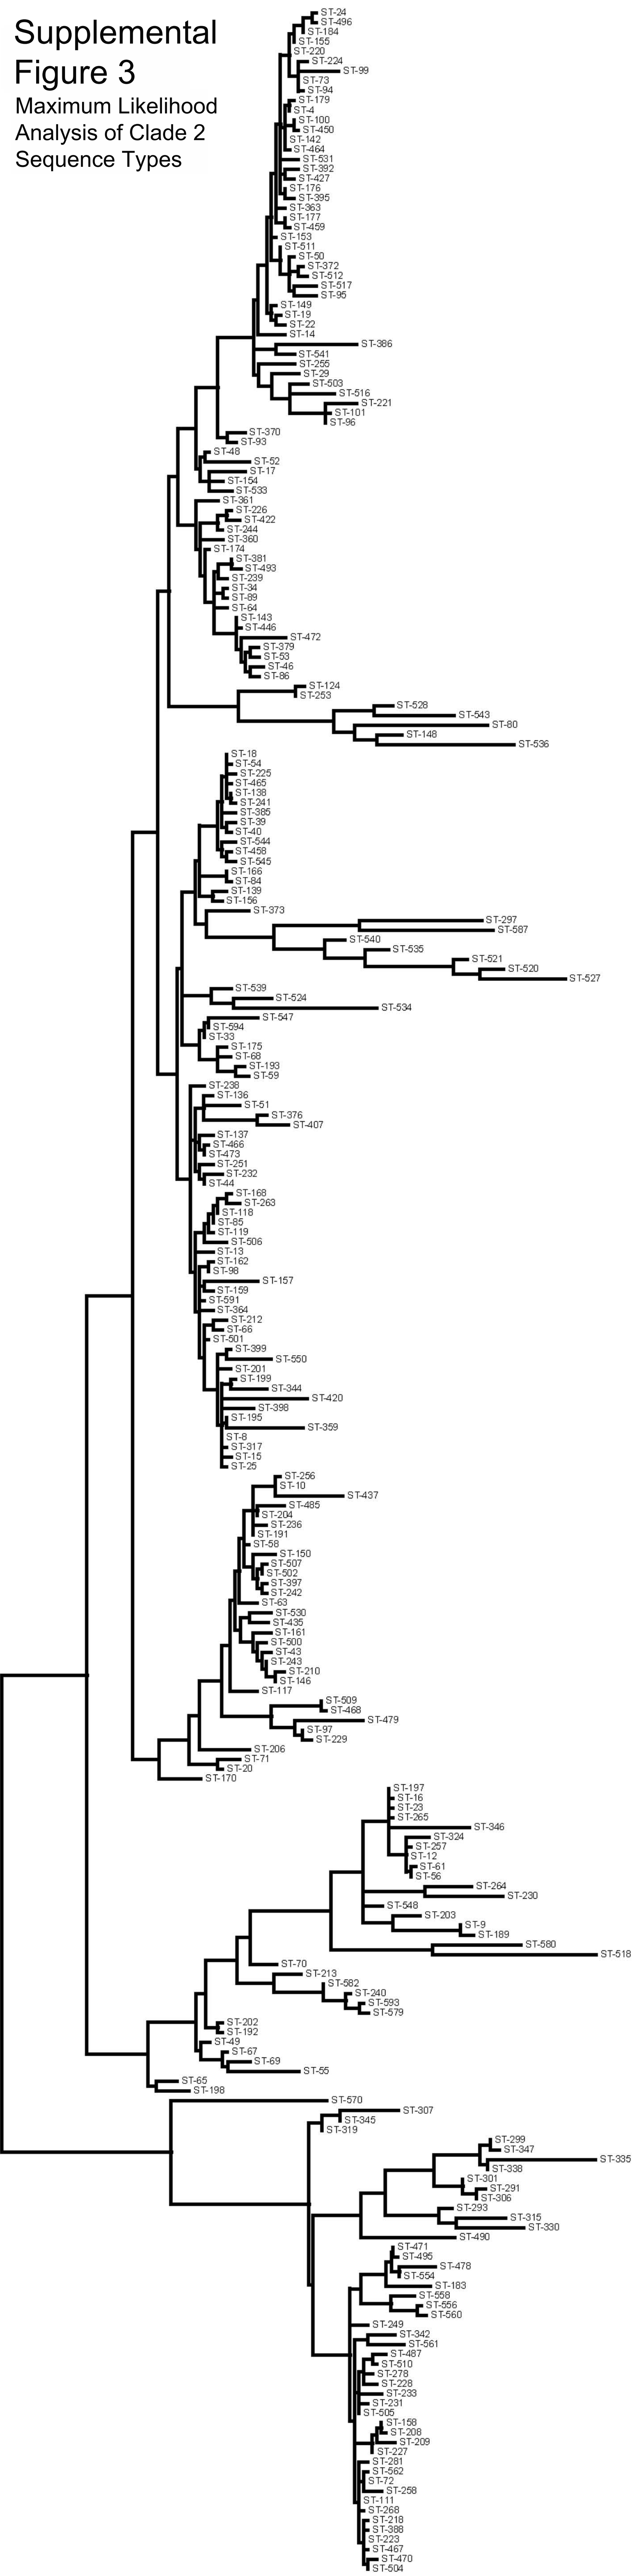

Supplement: pone.0066061.s003.pdf [file pone.0066061.s003.pdf]
