# Supplementary material for: Phylogenetic Distribution of Phenotypic Traits in Bacillus thuringiensis Determined by Multilocus Sequence Analysis
Source: PubMed Central journal article supplement (PMC3677866; doi:10.1371/journal.pone.0066061), 2013-06-10
Supplement: pone.0066061.s004.pdf [file pone.0066061.s004.pdf]

**Supplemental Table 1. Strains utilized in this study.**

| Strain   | Crystal Type* | Phenotype <sup>†</sup> | Country    | State | Toxicity to Lepid. | Toxicity to Diptera | Seq. Type |
|----------|---------------|------------------------|------------|-------|--------------------|---------------------|-----------|
| IBL 631  | attam         | LSAE                   | Morocco    |       | -                  | -                   | 171       |
| IBL 674  | attbp         | LSAE                   | India      |       | -                  | -                   | 171       |
| IBL 717  | attbp         | LSAE                   |            |       | -                  | -                   | 171       |
| IBL 1211 | attpyr        | LSAE                   | USA        | MD    | -                  | -                   | 171       |
| IBL 3268 | attam         | LSAE                   | Nepal      |       | -                  | -                   | 171       |
| IBL 3568 | attam         | LSAE                   | Brazil     |       | -                  | -                   | 171       |
| IBL 3604 | attam         | LSAE                   | Nepal      |       | -                  | -                   | 171       |
| IBL 3870 | attbp         | LSAE                   | USA        | WY    | -                  | -                   | 171       |
| IBL 4    | am            | ∅                      | USA        | NV    | -                  | -                   | 549       |
| IBL 1302 | am            | ∅                      | Turkey     |       | -                  | -                   | 549       |
| IBL 1306 | am            | ∅                      | USA        | CA    | -                  | +                   | 549       |
| IBL 3476 | am            | ∅                      | USA        | MD    | -                  | -                   | 197       |
| IBL 77   | bp            | T                      | USA        | WY    | +                  | -                   | 241       |
| IBL 117  | bp            | T                      | USA        | WY    | +                  | -                   | 16        |
| IBL 1677 | bp            | T                      | USA        | WY    | +                  | -                   | 239       |
| IBL 3090 | bp            | T                      | USA        | NY    | +                  | -                   | 23        |
| IBL 66   | am            | TL                     | USA        | IL    | -                  | +                   | 548       |
| IBL 189  | bp            | TL                     | USA        | AR    | +                  | -                   | 240       |
| IBL 4222 | am            | TL                     | USA        | MD    | -                  | +                   | 16        |
| IBL 429  | am            | TL                     | S. Korea   |       | -                  | +                   | 16        |
| IBL 431  | mix           | TL                     | Spain      |       | -                  | +                   | 16        |
| IBL 439  | am            | TL                     | Morocco    |       | -                  | +                   | 16        |
| IBL 933  | bp            | TL                     | Costa Rica |       | -                  | -                   | 241       |

|           |       |       |           |      |   |     |     |
|-----------|-------|-------|-----------|------|---|-----|-----|
| IBL 1374  | am    | TL    | Canada    |      | + | +   | 16  |
| IBL 3241  | am    | TL    | Norway    |      | - | +   | 16  |
| IBL 10003 | am    | TL    | Israel    |      | - | +   | 16  |
| IBL 441   | bpcu  | TLA   | Argentina |      | - | -   | 8   |
| IBL 966   | bpcu  | TLA   | Nepal     |      | + | -   | 8   |
| IBL 1252  | bpcu  | TLA   | S. Korea  |      | + | -   | 8   |
| IBL 2408  | attbp | TLA   | Spain     |      | - | -   | 171 |
| IBL 159   | am    | TLAE  | USA       | NM   | + | +   | 8   |
| IBL 1247  | am    | TLAE  | S. Korea  |      | + | -   | 8   |
| IBL 1254  | bpcu  | TLAE  | S. Korea  |      | + | -   | 8   |
| IBL 3565  | trap  | TLAE  | USA       | MD   | - | -   | 551 |
| IBL 389   | bp    | TLE   | USA       | D.C. | + | +   | 8   |
| IBL 483   | bp    | TLE   | Spain     |      | + | -   | 593 |
| IBL 621   | am    | TLE   | Egypt     |      | - | +   | 16  |
| IBL 1268  | bpcu  | TLE   | Argentina |      | - | +/- | 8   |
| IBL 184   | am    | TLS   | USA       | DC   | - | +   | 16  |
| IBL 416   | am    | TLS   | China     |      | - | +   | 16  |
| IBL 520   | am    | TLS   | USA       | FL   | - | -   | 547 |
| IBL 1297  | am    | TLS   | USA       | MD   | - | -   | 26  |
| IBL 425   | bp    | TLSA  | USA       | NY   | + | -   | 10  |
| IBL 480   | attam | TLSA  | Sweden    |      | - | -   | 171 |
| IBL 695   | bp    | TLSA  | USA       | HA   | + | -   | 22  |
| IBL 3576  | bp    | TLSA  | USA       | PA   | + | -   | 241 |
| IBL 299   | bp    | TLSAE | USA       | MD   | - | -   | 241 |

|          |        |       |          |    |     |     |     |
|----------|--------|-------|----------|----|-----|-----|-----|
| IBL 464  | bp     | TLSAE | USA      | MD | +/- | -   | 241 |
| IBL 535  | attcry | TLSAE | USA      | MD | -   | -   | 171 |
| IBL 1132 | attbp  | TLSAE | Norway   |    | -   | -   | 171 |
| IBL 1489 | attbp  | TLSAE | Spain    |    | -   | -   | 171 |
| IBL 1613 | attbp  | TLSAE | Spain    |    | -   | +   | 171 |
| IBL 3511 | am     | TLSAE | USA      | MD | -   | -   | 592 |
| IBL 3870 | attbp  | TLSAE | USA      | WY | -   | -   | 171 |
| IBL 54   | bpcu   | TLU   | USA      | MT | +   | -   | 240 |
| IBL 61   | bp     | TLU   | USA      | MT | +   | -   | 240 |
| IBL 563  | bpcu   | TLU   | USA      | NC | +   | -   | 8   |
| IBL 1288 | bpcu   | TLU   | Azores   |    | +   | -   | 8   |
| IBL 55   | pyr    | TLUA  | USA      | WY | -   | +   | 550 |
| IBL 743  | bp     | TLUA  | USA      | MD | +   | -   | 8   |
| IBL 999  | bpcu   | TLUA  | USA      | MD | +   | +/- | 8   |
| IBL 1115 | bpcu   | TLUA  | Iceland  | NA | +   | -   | 240 |
| IBL 84   | bpam   | TLUAE | USA      | WI | +   | -   | 8   |
| IBL 88   | bp     | TLUAE | USA      | ND | +   | -   | 8   |
| IBL 455  | bp     | TLUAE | USA      |    | +   | -   | 8   |
| IBL 533  | bp     | TLUAE | Vietnam  |    | +   | -   | 8   |
| IBL 661  | bp     | TLUAE | USA      | PA | +   | -   | 8   |
| IBL 749  | bpcu   | TLUAE | Nepal    |    | +   | -   | 8   |
| IBL 850  | bp     | TLUAE | Pakistan |    | +   | -   | 8   |
| IBL 2469 | bp     | TLUAE | France   |    | +   | -   | 8   |
| IBL 122  | bp     | TS    | USA      | WY | +   | -   | 23  |

|                  |             |             |                 |           |          |          |            |
|------------------|-------------|-------------|-----------------|-----------|----------|----------|------------|
| <b>IBL 500</b>   | <b>bp</b>   | <b>TS</b>   | <b>Norway</b>   |           | <b>+</b> | <b>-</b> | <b>23</b>  |
| <b>IBL 747</b>   | <b>bp</b>   | <b>TS</b>   | <b>USA</b>      | <b>NY</b> | <b>+</b> | <b>-</b> | <b>23</b>  |
| <b>IBL 1410</b>  | <b>rect</b> | <b>TS</b>   | <b>USA</b>      |           | <b>-</b> | <b>-</b> | <b>23</b>  |
| <b>IBL 1969</b>  | <b>bp</b>   | <b>TS</b>   | <b>India</b>    |           | <b>+</b> | <b>-</b> | <b>23</b>  |
| <b>IBL 3221</b>  | <b>bp</b>   | <b>TS</b>   | <b>Portugal</b> |           | <b>-</b> | <b>-</b> | <b>241</b> |
| <b>IBL 3572</b>  | <b>bp</b>   | <b>TS</b>   | <b>USA</b>      | <b>NY</b> | <b>+</b> | <b>+</b> | <b>23</b>  |
| <b>IBL 10010</b> | <b>bp</b>   | <b>TS</b>   |                 |           | <b>+</b> | <b>-</b> | <b>23</b>  |
| <b>IBL 273</b>   | <b>bp</b>   | <b>TSAE</b> | <b>USA</b>      | <b>WY</b> | <b>+</b> | <b>-</b> | <b>23</b>  |
| <b>IBL 275</b>   | <b>bp</b>   | <b>TSAE</b> | <b>USA</b>      | <b>WY</b> | <b>+</b> | <b>-</b> | <b>23</b>  |
| <b>IBL 3095</b>  | <b>am</b>   | <b>TSAE</b> | <b>USA</b>      | <b>NY</b> | <b>+</b> | <b>-</b> | <b>547</b> |
| <b>IBL 3579</b>  | <b>bp</b>   | <b>TSAE</b> | <b>USA</b>      | <b>NY</b> | <b>+</b> | <b>-</b> | <b>23</b>  |

\* am-amorphous; att-attached; bp-bipyramidal; cu-cubic; pyr-pyramidal; rect- rectangular; trap- trapezoidal

† Letters indicate positive phenotypic traits: T-amylase; L- lecithinase; U-urease; S-acid from sucrose; A-acid from salicin; E-hydrolysis of esculin
